# Supplementary material
Source: HighWire-hosted journal article supplement (https://bmjophth.bmj.com/content/8/1/e001171)
Supplement: inline-supplementary-material-1 [file inline-supplementary-material-1.pdf]

## Supporting Information

### **Epidemiological features and management of eye burn patients in Wuxi, China**

Zi-Jing Lu<sup>1,2,#</sup>, Ting Chu<sup>1#</sup>, Zhi-Hui Yang<sup>1,2</sup>, Xin Xia<sup>1</sup>, Yi-Hui Shen<sup>4</sup>, Jian-Huan Chen<sup>3\*</sup>, Ji-Hong Wang<sup>1,2\*</sup>

<sup>1</sup> Ophthalmology Department, Affiliated Hospital of Jiangnan University, No. 1000, Hefeng Road, Binhu District, Wuxi, 214100, China

<sup>2</sup> Wuxi School of Medicine, Jiangnan University, Wuxi 214122, China

<sup>3</sup>Laboratory of Genomic and Precision Medicine, Wuxi School of Medicine, Jiangnan University, Wuxi 214122, China

<sup>4</sup>Nursing Department, Affiliated Hospital of Jiangnan University, No. 1000, Hefeng Road, Binhu District, Wuxi, 214100, China

# Equal contribution.

\* Corresponding author.

E-mail: 108026608@qq.com (Ji-Hong Wang).

E-mail: cjh\_bio@hotmail.com (Jian-Huan Chen).

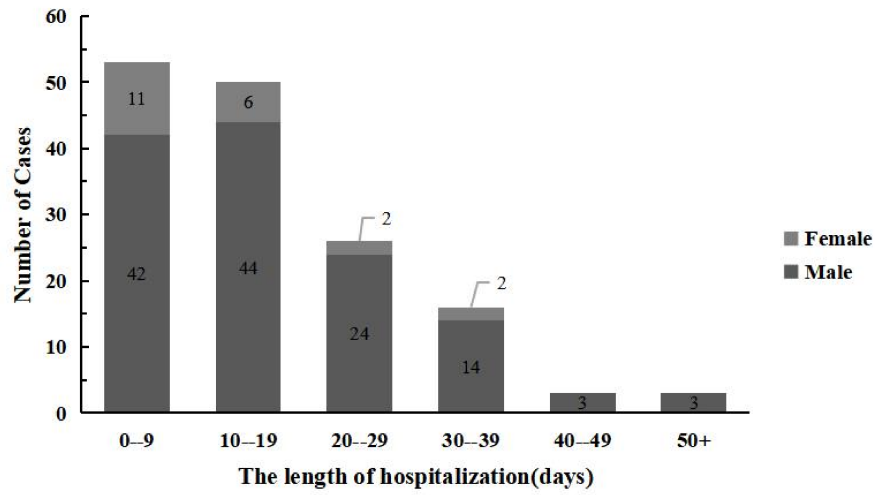

**Figure S1. Number of eye burn patients represented graphically according to the length of hospitalization by gender group.**

**Table S1. Vision situation of eye burn patients (N=151)**

| Gender | Case | Admitting diagnosis | Discharge diagnosis | T value | P value         |
|--------|------|---------------------|---------------------|---------|-----------------|
| Total  | 151  | 0.06±0.06           | 0.16±0.13           | 12.24   | <i>P</i> <0.001 |
| Male   | 130  | 0.06±0.06           | 0.16±0.12           | 11.38   | <i>P</i> <0.001 |
| Female | 21   | 0.07±0.07           | 0.18±0.16           | 4.45    | <i>P</i> <0.001 |

**Table S2. Crude associations of taking Traditional Chinese Medicine and hospitalization days (N=151)**

| TCM              | Days(M±SD)  | P=0.276 |
|------------------|-------------|---------|
| Taking(n=72)     | 18.65±16.34 |         |
| Not taking(n=79) | 16.06±12.68 |         |
